# Supplementary material for: Nonlinear optical-active ferrocene conjugated Y-shaped imidazole donor–π–acceptor [(D–π)2–IM–π–A] compounds for dye-sensitized solar cells using non-corrosive copper complexes as a redox mediator
Source: Royal Society of Chemistry journal article supplement (doi:10.1039/d3nj03668e), 2023-11-20
Supplement: d3nj03668e1.pdf [file d3nj03668e1.pdf]

**Nonlinear optical-active ferrocene conjugated Y-shaped imidazole donor- $\pi$ -acceptor [(D- $\pi$ )<sub>2</sub>-IM- $\pi$ -A] compounds for dye-sensitized solar cells using non-corrosive copper complexes as a redox mediator**

Selvam Prabu,<sup>a</sup> Francesco Fagnani,<sup>b\*</sup> Alessia Colombo,<sup>b</sup> Claudia Dragonetti,<sup>b</sup> Paolo Biagini,<sup>c</sup>  
Fabio Melchiorre,<sup>c</sup> Nallasamy Palanisami<sup>a\*</sup>

<sup>a</sup> Centre for Functional Materials, Department of Chemistry, School of Advanced Sciences,  
Vellore Institute of Technology, Vellore-632014, Tamil Nadu, India.

<sup>b</sup> Department of Chemistry, University of Milan and UdR-INSTM, Via C. Golgi 19, I-20133  
Milan, Italy

<sup>c</sup> Renewable, new Energies and Material Science Research Centre, Istituto Guido Donegani,  
Eni S.p.A., via G. Fauser, 4 I-28100 Novara, Italy

Corresponding authors: E-mail: palanisami.n@gmail.com, palanisami.n@vit.ac.in,  
francesco.fagnani@unimi.it

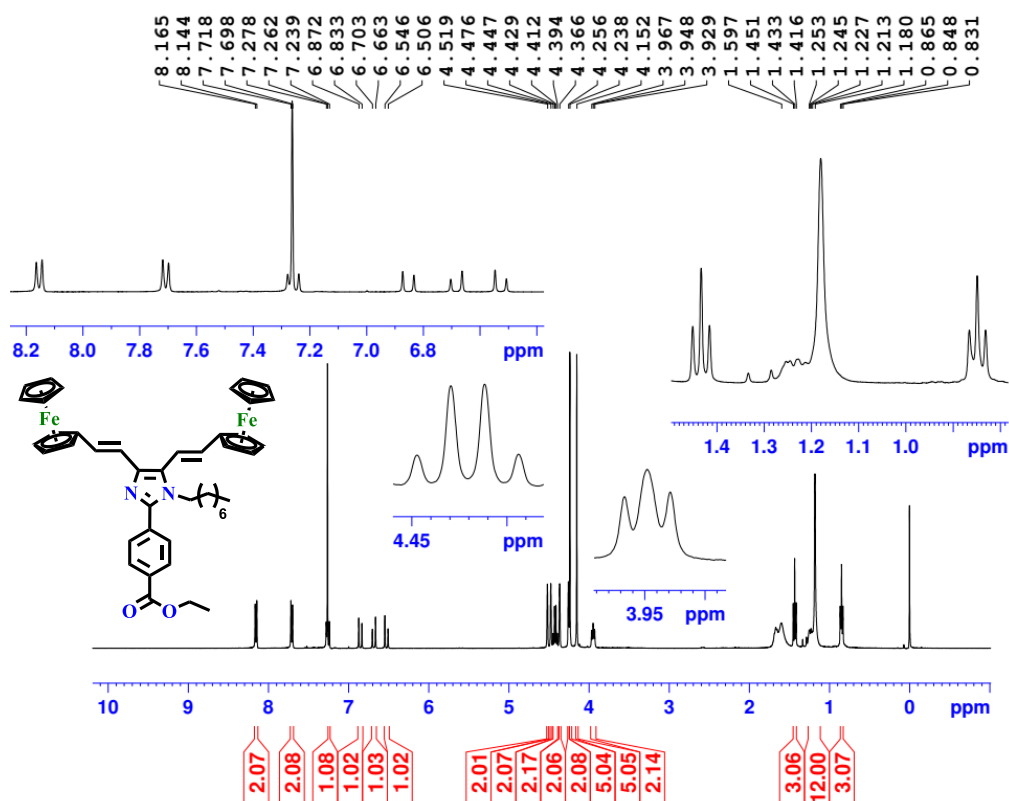

Figure S1. <sup>1</sup>H NMR spectrum of compound **1** in CDCl<sub>3</sub> at 25 °C.

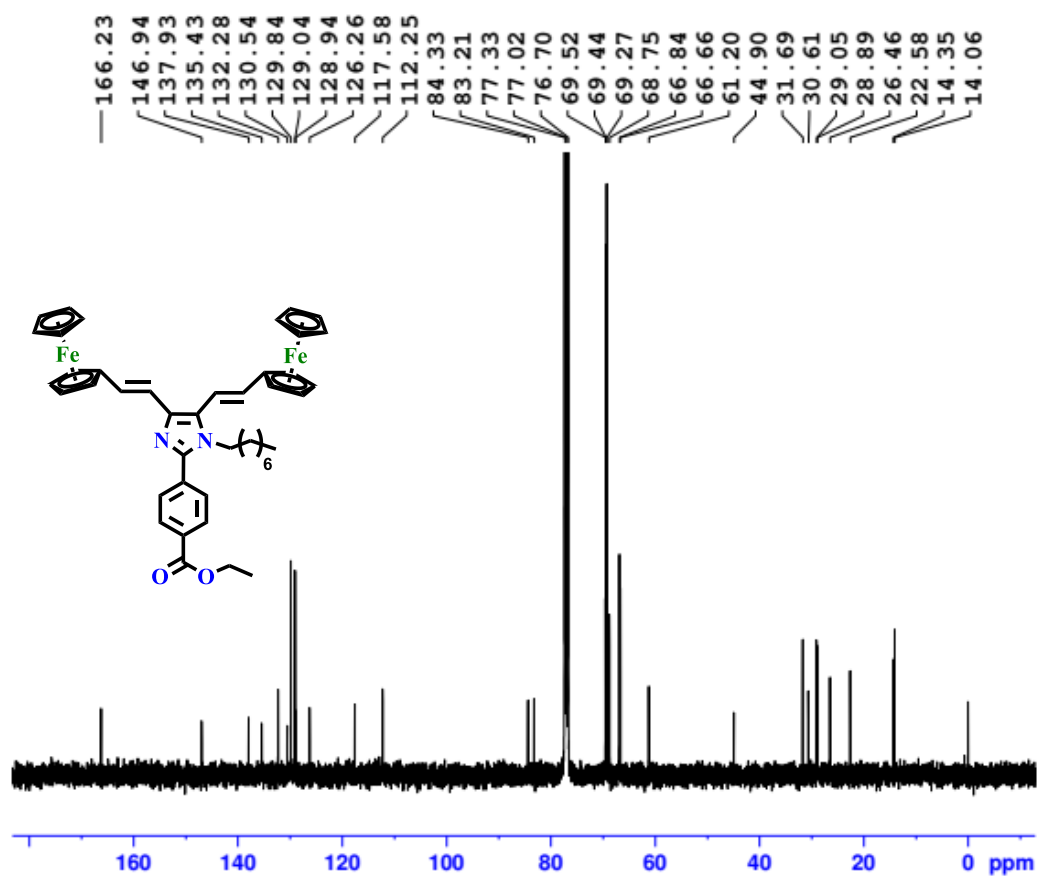

Figure S2. <sup>13</sup>C NMR spectrum of compound **1** in CDCl<sub>3</sub> at 25 °C.

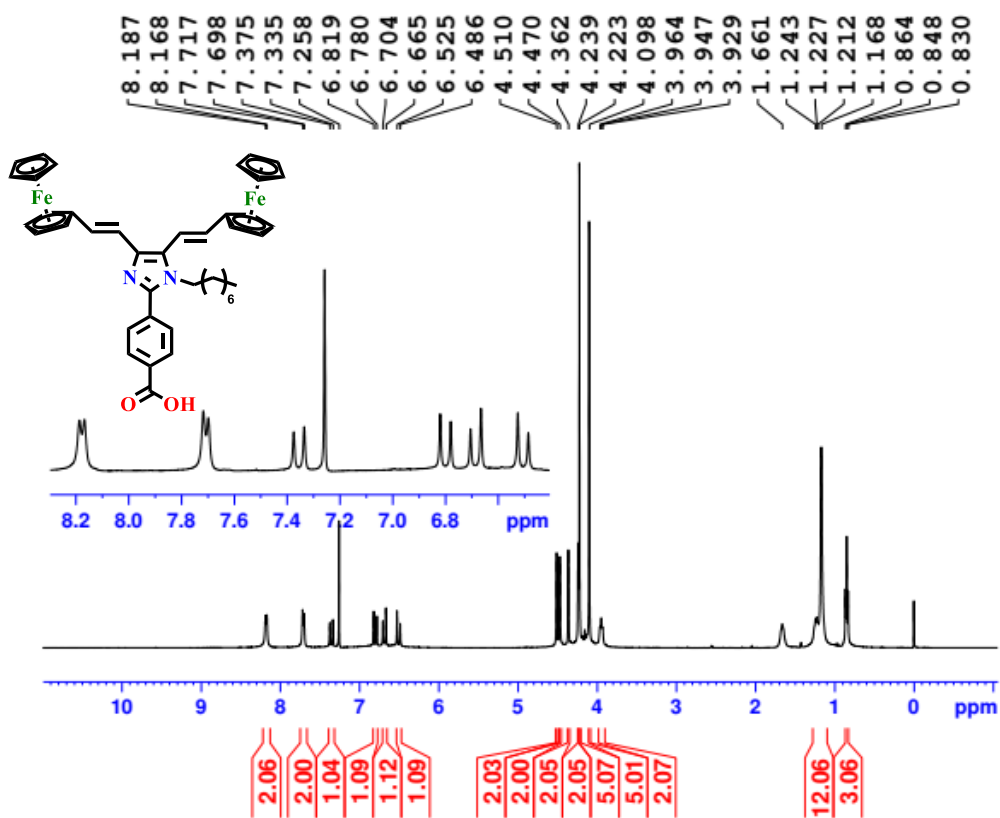

Figure S3. <sup>1</sup>H NMR spectrum of compound 2 in CDCl<sub>3</sub> at 25 °C.

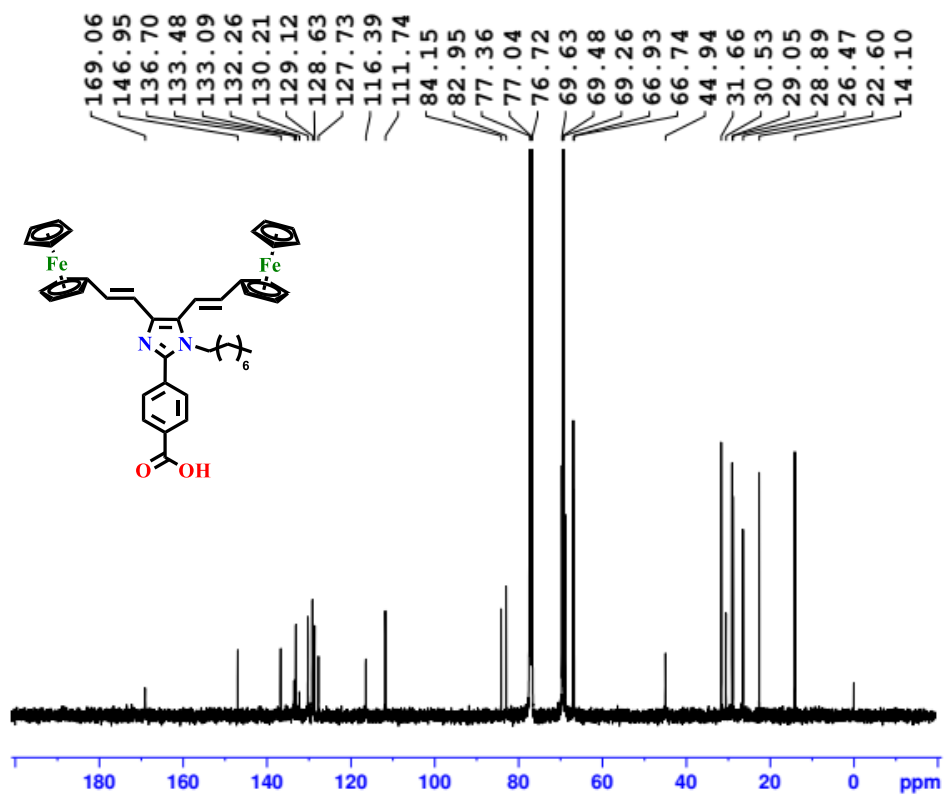

Figure S4. <sup>13</sup>C NMR spectrum of compound 2 in CDCl<sub>3</sub> at 25 °C.

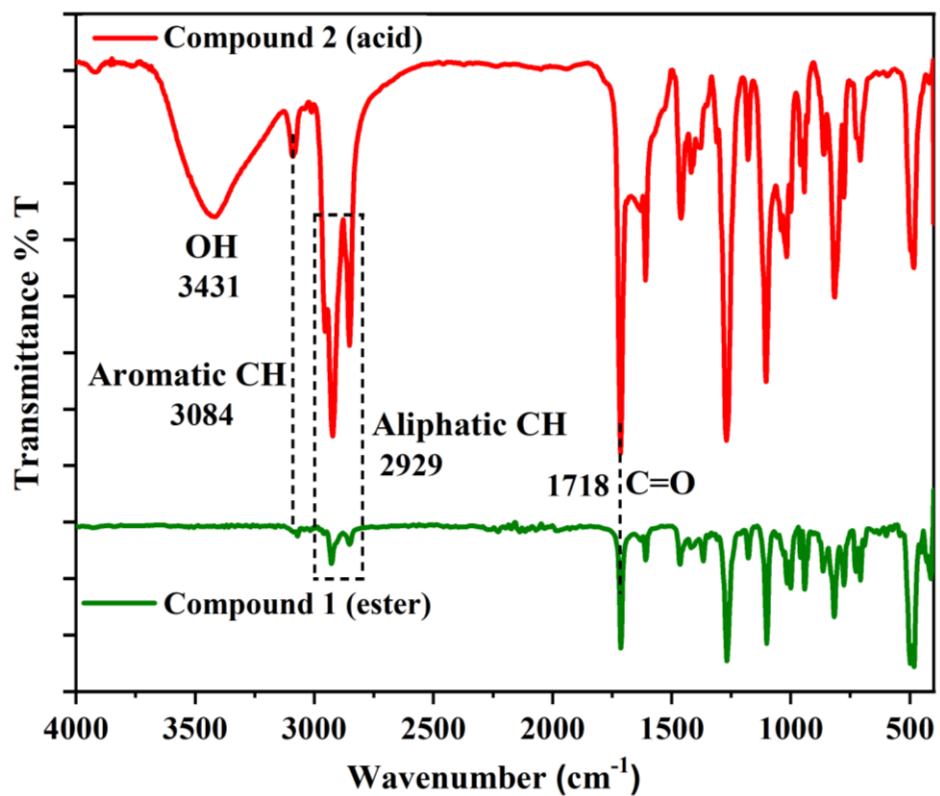

Figure S5. FT-IR spectra for compounds 1 and 2.

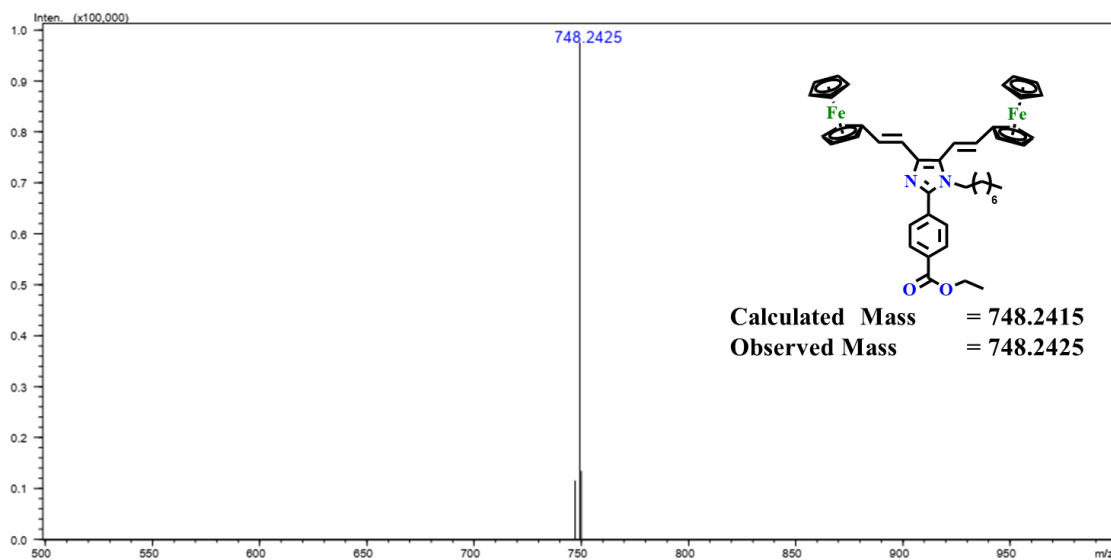

Figure S6. ESI-Mass spectrum of compound 1.

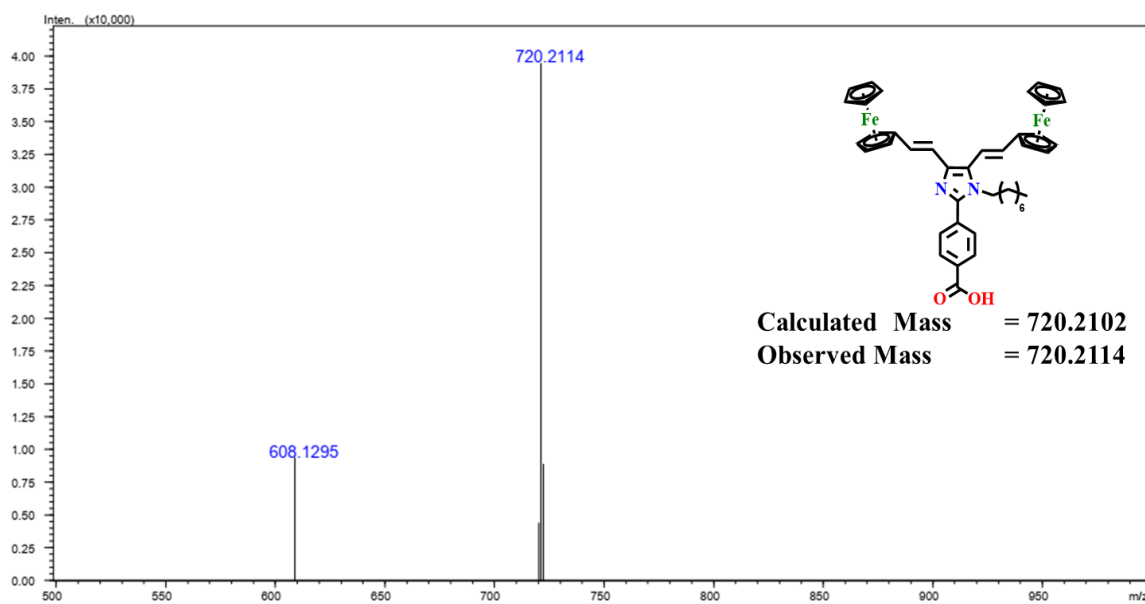

**Figure S7.** ESI-Mass spectrum of compound 2.

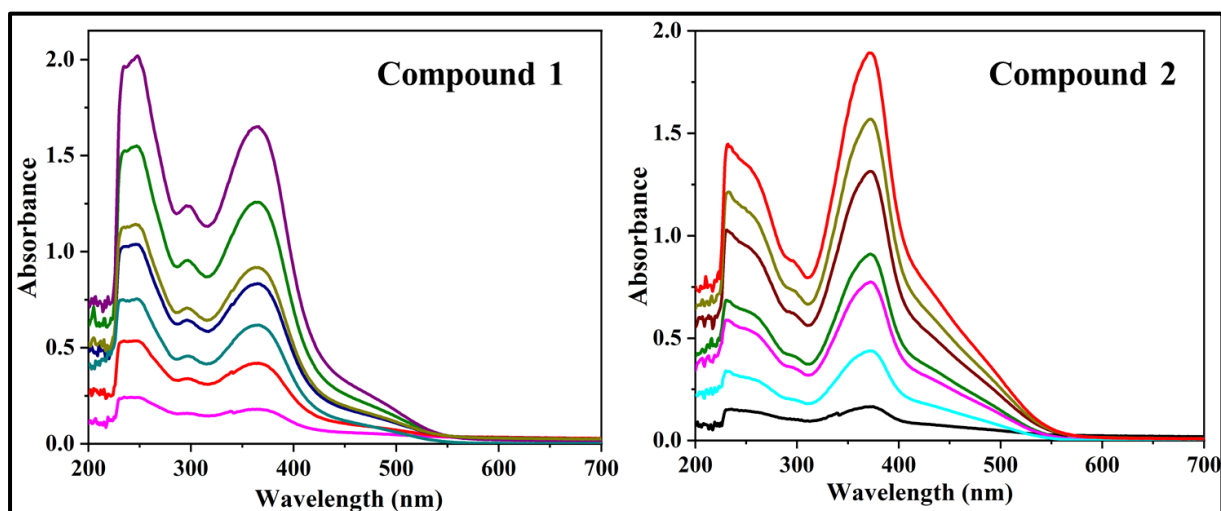

**Figure S8.** Absorption spectra of compounds 1 and 2 in  $\text{CH}_2\text{Cl}_2$  solution using different concentrations.

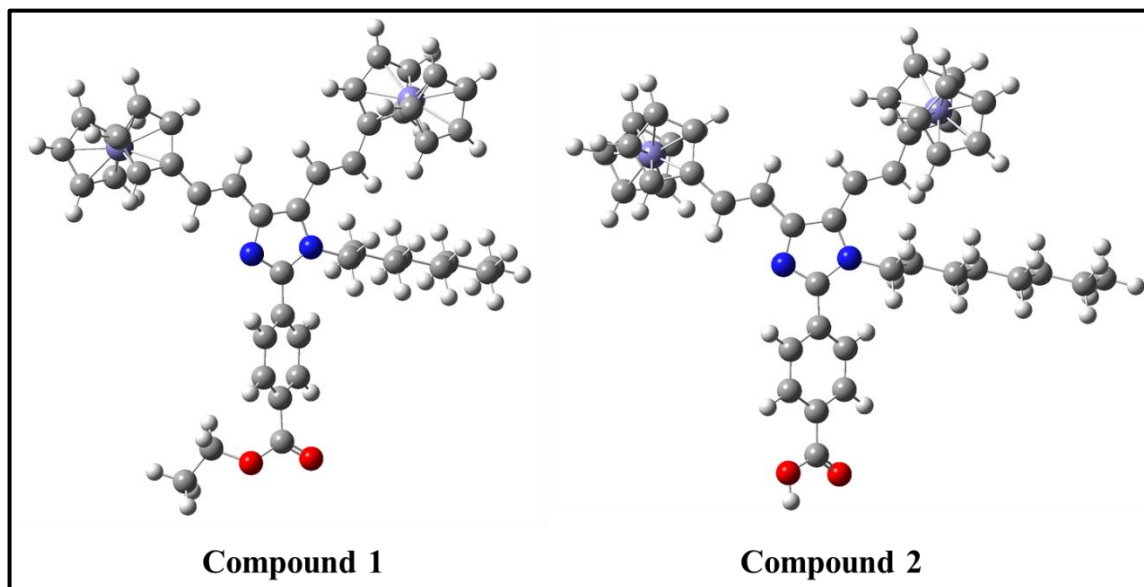

**Figure S9.** The optimized geometries of compounds **1** and **2** obtained at B3LYP/6-31+G\*\* level of theory

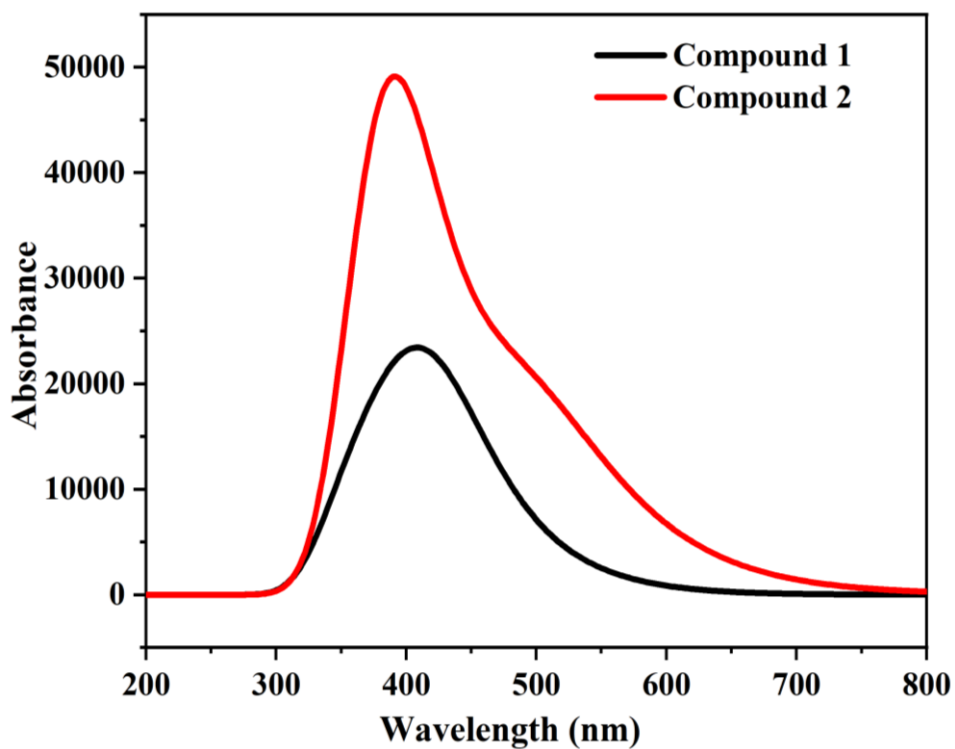

**Figure S10.** Theoretically calculated absorption spectra for compounds **1** and **2**. The absorption spectra were obtained by TD-DFT (dichloromethane solvent) with B3LYP/6-31+G\*\* level of theory.

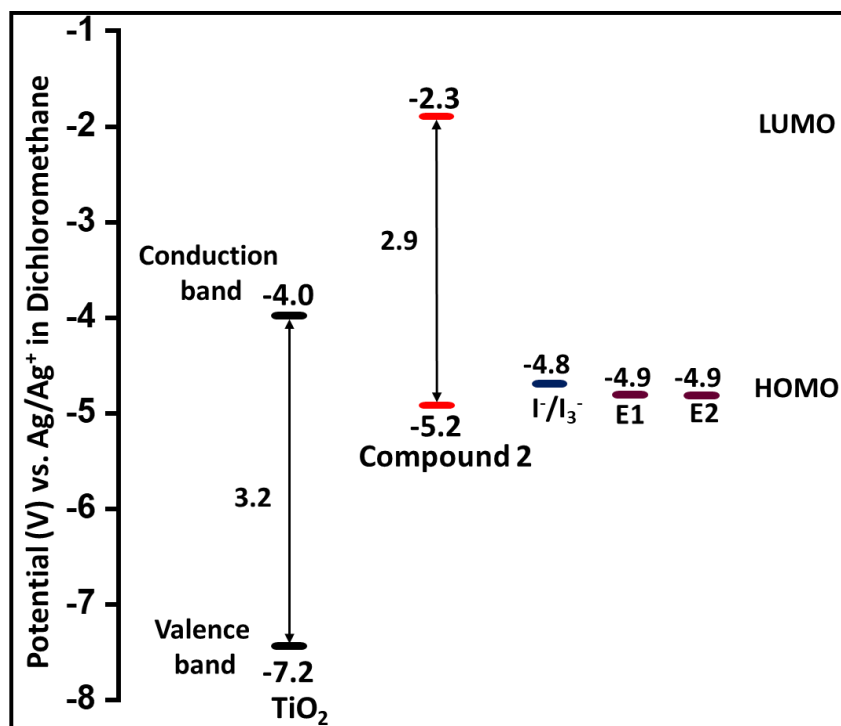

**Figure S11.** The energy level diagram of compound **2** including the conduction band of TiO<sub>2</sub> and redox couples.

**Table S1.** Selected transitions obtained from TD-DFT calculation with B3LYP/6-31+G\*\* level theory

| Entry               | $\lambda$<br>(nm) | Oscillator<br>strength, $f$ | Energy<br>(eV) | Selected Major Transitions <sup>a</sup>                  |
|---------------------|-------------------|-----------------------------|----------------|----------------------------------------------------------|
| <b>1</b><br>(ester) | 408               | 0.3995                      | 3.33           | H $\rightarrow$ L+1 (40%)                                |
|                     | 447               | 0.3425                      | 2.76           | H $\rightarrow$ L (91%)                                  |
|                     | 386               | 0.2822                      | 3.20           | H $\rightarrow$ L+1 (38%)                                |
|                     | 388               | 0.0394                      | 3.18           | H-2 $\rightarrow$ L (52%)                                |
|                     | 571               | 0.0263                      | 2.16           | H-3 $\rightarrow$ L+4 (16%)                              |
|                     | 375               | 0.0254                      | 3.30           | H-1 $\rightarrow$ L+1 (27%), H-6 $\rightarrow$ L+6 (16%) |
|                     | 495               | 0.0214                      | 2.50           | H-6 $\rightarrow$ L+3 (12%)                              |
|                     | 354               | 0.0198                      | 3.49           | H-4 $\rightarrow$ L (52%)                                |
| <b>2</b><br>(acid)  | 390               | 0.5224                      | 3.17           | H $\rightarrow$ L+1 (36%),                               |
|                     | 395               | 0.3520                      | 3.13           | H $\rightarrow$ L+1 (36%)                                |
|                     | 483               | 0.3041                      | 2.56           | H $\rightarrow$ L (73%)                                  |
|                     | 379               | 0.1616                      | 3.26           | H-2 $\rightarrow$ L+5 (17%), H-1 $\rightarrow$ L+1 (17%) |
|                     | 371               | 0.1132                      | 3.33           | H-4 $\rightarrow$ L (21%), H-3 $\rightarrow$ L+4 (14%)   |
|                     | 499               | 0.1073                      | 2.48           | H-5 $\rightarrow$ L+4 (33%), H $\rightarrow$ L (19%)     |
|                     | 409               | 0.0337                      | 3.02           | H-1 $\rightarrow$ L (90%)                                |
|                     | 377               | 0.0211                      | 3.28           | H-2 $\rightarrow$ L+1 (31%)                              |
|                     | 495               | 0.0181                      | 2.50           | H-2 $\rightarrow$ L+5 (32%)                              |
|                     | 344               | 0.0134                      | 3.59           | H-1 $\rightarrow$ L+1 (46%), H $\rightarrow$ L+3 (18%)   |

<sup>a</sup> H = HOMO; L = LUMO; only contributions above 10% are included.

**Table S2.** Density surfaces of the frontier orbitals involved in electronic transitions of compounds **1** and **2** which is derived from B3LYP/6-31+G\*\* level of theory using isosurface value of 0.02 au.

| Orbitals | 1                                                                                   | 2                                                                                    |
|----------|-------------------------------------------------------------------------------------|--------------------------------------------------------------------------------------|
| HOMO-5   | 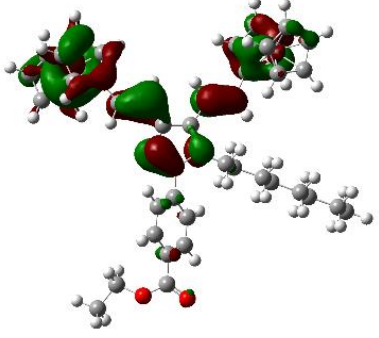   |    |
| HOMO-4   |   |   |
| HOMO-3   |  |  |
| HOMO-2   |  |  |



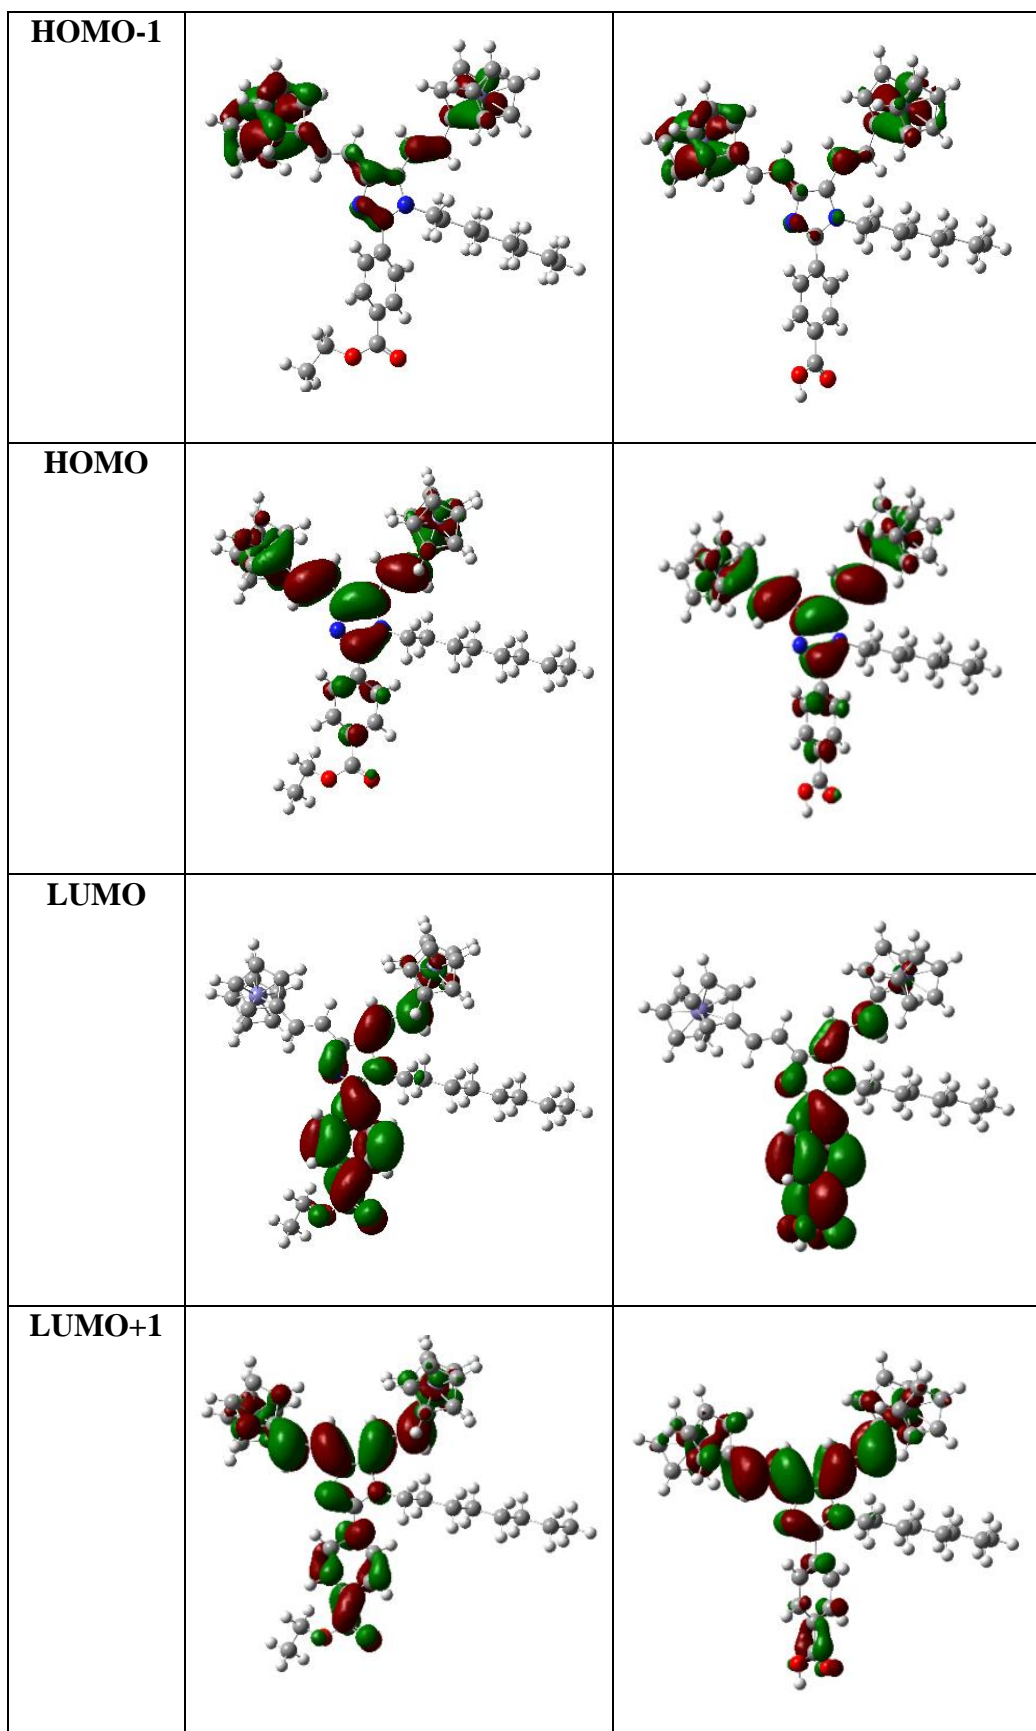

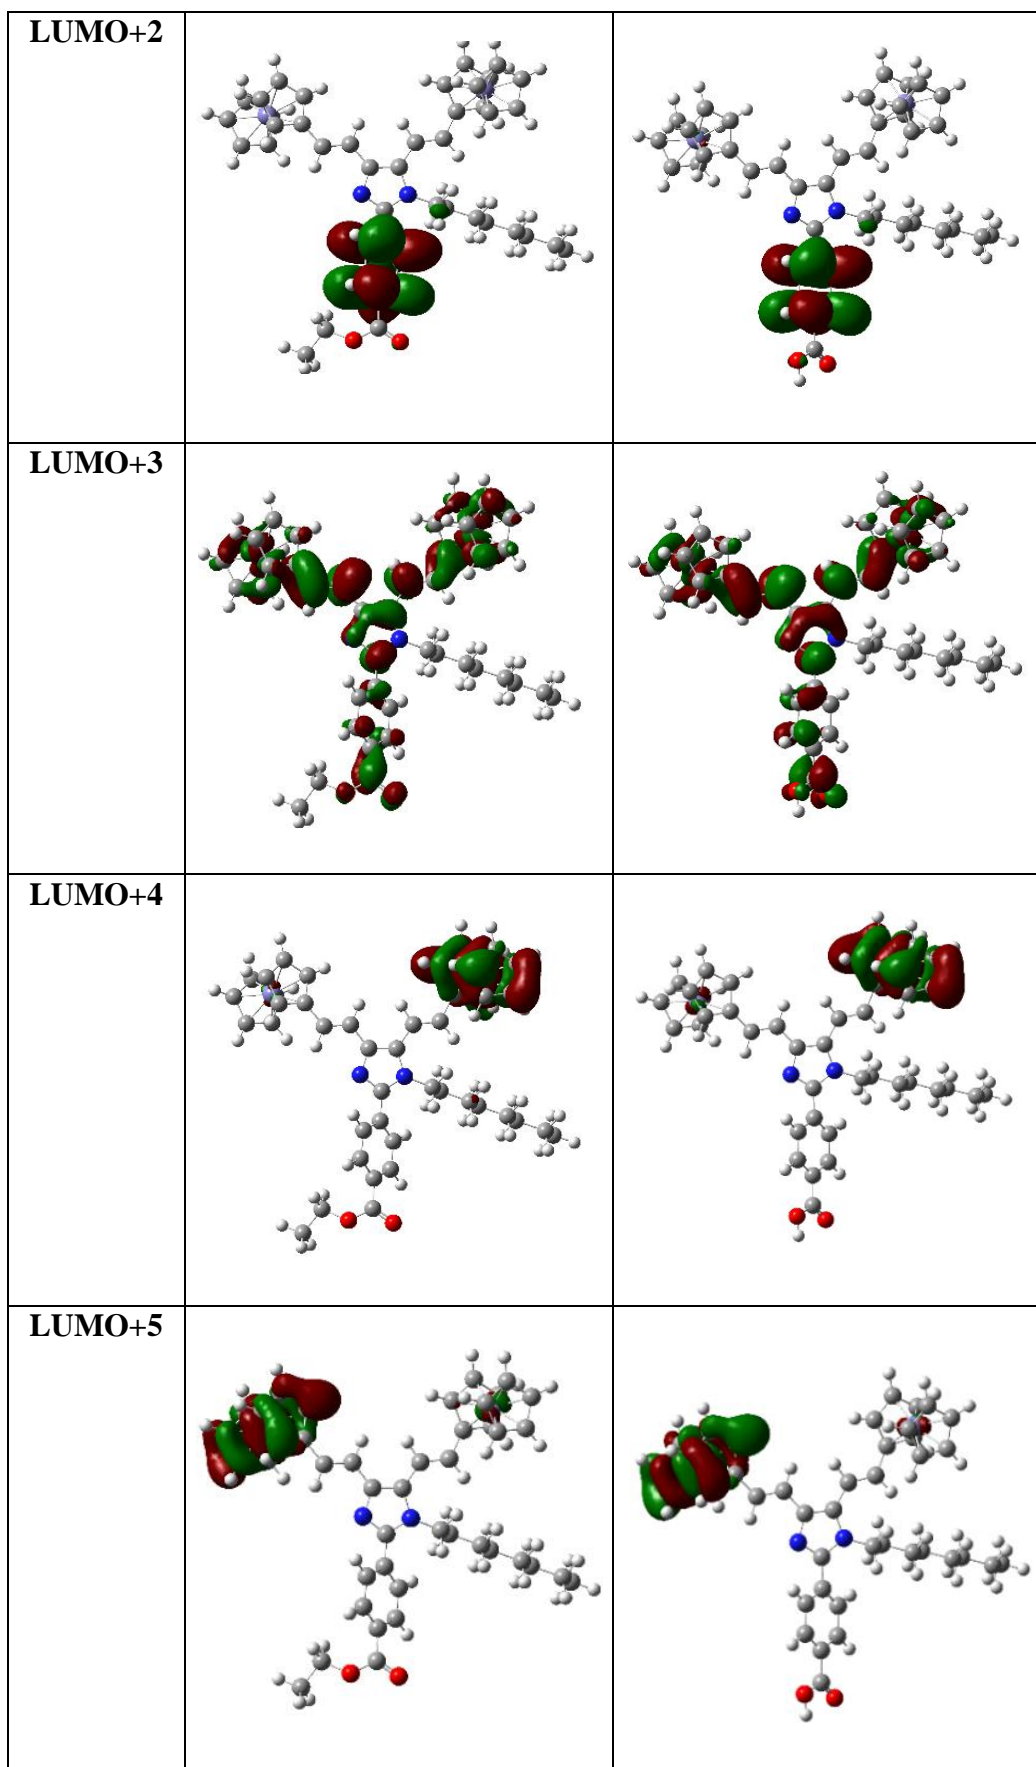

**Table S3.** DSSC performance of some previously reported ferrocene (Fc) based sensitizers

| Dye                                          | $J_{sc}$<br>( $\text{mAcm}^{-2}$ )        | $V_{oc}$<br>(V)                           | FF                                        | $\eta$ (%)                                | Redox mediator                                                              | Ref              |
|----------------------------------------------|-------------------------------------------|-------------------------------------------|-------------------------------------------|-------------------------------------------|-----------------------------------------------------------------------------|------------------|
| Fc-dithiocarbamates 1                        | 5.72                                      | -0.74                                     | 0.74                                      | 3.14                                      |                                                                             |                  |
| 2                                            | 5.09                                      | -0.74                                     | 0.74                                      | 2.80                                      |                                                                             |                  |
| 3                                            | 4.74                                      | -0.74                                     | 0.73                                      | 2.59                                      |                                                                             |                  |
| 4                                            | 7.14                                      | -0.74                                     | 0.73                                      | 3.87                                      |                                                                             |                  |
| 5                                            | 6.41                                      | -0.74                                     | 0.72                                      | 3.46                                      |                                                                             |                  |
| 6                                            | 6.83                                      | -0.74                                     | 0.73                                      | 3.69                                      | I/I <sub>3</sub> <sup>-</sup>                                               | 1                |
| Fc-triphenylamine D1                         | 8.13                                      | 0.66                                      | 0.68                                      | 3.65                                      |                                                                             |                  |
| D2                                           | 9.84                                      | 0.72                                      | 0.70                                      | 4.96                                      | I/I <sub>3</sub> <sup>-</sup>                                               | 2                |
| Fc-diketopyrrolopyrrole                      |                                           |                                           |                                           |                                           |                                                                             |                  |
| P:SM1                                        | 11.34                                     | 0.98                                      | 0.58                                      | 6.44                                      |                                                                             |                  |
| P:SM2                                        | 12.66                                     | 0.88                                      | 0.62                                      | 6.89                                      | I/I <sub>3</sub> <sup>-</sup>                                               | 3                |
| Fc-benzimidazole NO <sub>2</sub>             | 9.75                                      | -0.628                                    | 0.61                                      | 3.71                                      |                                                                             |                  |
| COOH                                         | 12.74                                     | -0.648                                    | 0.70                                      | 5.81                                      | I/I <sub>3</sub> <sup>-</sup>                                               | 4                |
| Fc-diketenone                                | 2.56                                      | -0.552                                    | 0.57                                      | 0.81                                      |                                                                             |                  |
| Fc-Quinoxaline                               | 3.57                                      | -0.576                                    | 0.59                                      | 1.22                                      |                                                                             |                  |
| Fc-Quinoxaline-Cl                            | 5.14                                      | -0.630                                    | 0.61                                      | 1.97                                      |                                                                             |                  |
| Fc-Quinoxaline-NO <sub>2</sub>               | 7.38                                      | -0.642                                    | 0.71                                      | 3.38                                      |                                                                             |                  |
| Fc-Quinoxaline-COOH                          | 9.14                                      | -0.646                                    | 0.71                                      | 4.42                                      | I/I <sub>3</sub> <sup>-</sup>                                               | 5                |
| Fc-D1 (AN-50)                                | 0.730                                     | 0.407                                     | 0.584                                     | 0.180                                     |                                                                             |                  |
| Fc-D1 (Hybrid)                               | 0.610                                     | 0.405                                     | 0.612                                     | 0.160                                     |                                                                             |                  |
| Fc-D2 (AN-50)                                | 0.590                                     | 0.337                                     | 0.579                                     | 0.115                                     |                                                                             |                  |
| Fc-D2 (Hybrid)                               | 0.380                                     | 0.770                                     | 0.603                                     | 0.190                                     |                                                                             |                  |
| Fc-D3 (AN-50)                                | 1.070                                     | 0.434                                     | 0.575                                     | 0.270                                     |                                                                             |                  |
| Fc-D3 (Hybrid)                               | 1.190                                     | 0.494                                     | 0.541                                     | 0.325                                     | I/I <sub>3</sub> <sup>-</sup>                                               | 6                |
| Ferrocenyl cyanoviny 1                       | 0.41                                      | 0.763                                     | 35                                        | 0.10                                      |                                                                             |                  |
| 2                                            | 0.039                                     | 0.841                                     | 28                                        | 0.009                                     | I/I <sub>3</sub> <sup>-</sup>                                               | 7                |
| Ferrocenyl azine Fc-OH                       | 12.91                                     | 0.710                                     | 0.64                                      | 5.88                                      |                                                                             |                  |
| Fc-NO <sub>2</sub>                           | 9.21                                      | 0.690                                     | 0.63                                      | 4.04                                      | I/I <sub>3</sub> <sup>-</sup>                                               | 8                |
| FcCH=NC <sub>6</sub> H <sub>4</sub> COOH (1) | 8.28                                      | -0.648                                    | 0.71                                      | 0.81                                      |                                                                             |                  |
| FcCH=NCH <sub>2</sub> CH <sub>2</sub> OH (2) | 7.24                                      | -0.660                                    | 0.67                                      | 0.68                                      |                                                                             |                  |
| Fc-CHO (3)                                   | 7.60                                      | -0.640                                    | 0.71                                      | 0.73                                      | I/I <sub>3</sub> <sup>-</sup>                                               | 9                |
| Fc-Multi donor systems                       |                                           |                                           |                                           |                                           |                                                                             |                  |
| Dye 1                                        | 0.025                                     | 0.211                                     | 0.318                                     | 0.0017                                    |                                                                             |                  |
| Dye 2                                        | 0.049                                     | 0.282                                     | 0.347                                     | 0.0047                                    |                                                                             |                  |
| Dye 1 + CDCA                                 | 0.071                                     | 0.388                                     | 0.452                                     | 0.012                                     |                                                                             |                  |
| Dye 2 + CDCA                                 | 0.086                                     | 0.428                                     | 0.432                                     | 0.015                                     | I/I <sub>3</sub> <sup>-</sup>                                               | 10               |
| Fc-modified zinc phthalocyanine              | 0.014                                     | 45                                        | 0.48                                      | 0.003                                     | I/I <sub>3</sub> <sup>-</sup>                                               | 11               |
| Fc-chalcones Fc1                             | 0.606                                     | 0.593                                     | 58.70                                     | 0.211                                     |                                                                             |                  |
| Fc2                                          | 0.776                                     | 0.601                                     | 52.70                                     | 0.246                                     | I/I <sub>3</sub> <sup>-</sup>                                               | 12               |
| Ferrocene appended porphyrin F3P             | 0.068                                     | 0.283                                     | 0.42                                      | 0.008                                     | Co(II)/Co(III)                                                              | 13               |
| Y-shaped imidazole acid (compound 2)         | <b>1.51</b><br><b>1.18</b><br><b>0.95</b> | <b>0.40</b><br><b>0.41</b><br><b>0.40</b> | <b>42.7</b><br><b>39.1</b><br><b>40.6</b> | <b>0.26</b><br><b>0.19</b><br><b>0.16</b> | I/I <sub>3</sub> <sup>-</sup><br><b>Cu(I)/Cu(II)</b><br><b>Cu(I)/Cu(II)</b> | <b>This work</b> |

## References

1. V. Singh, R. Chauhan, A. N. Gupta, V. Kumar, M. G. Drew, L. Bahadur and N. Singh, Photosensitizing activity of ferrocenyl bearing Ni (II) and Cu (II) dithiocarbamates in dye sensitized TiO<sub>2</sub> solar cells, *Dalton Trans.*, 2014, **43**(12), 4752-4761.
2. R. Misra, R. Maragani, K. R. Patel and G. D. Sharma, Synthesis, optical and electrochemical properties of new ferrocenyl substituted triphenylamine based donor–acceptor dyes for dye sensitized solar cells, *RSC Adv.*, 2014, **4**(66), 34904-34911.
3. Y. Patil, R. Misra, R. Singhal and G. D. Sharma, Ferrocene-diketopyrrolopyrrole based non-fullerene acceptors for bulk heterojunction polymer solar cells, *J. Mater. Chem. A*, 2017, **5**(26), 13625-13633.
4. R. Yadav, A. Singh, G. Kociok-Köhn, R. Chauhan, A. Kumar and S. Gosavi, Ferrocenyl benzimidazole with carboxylic and nitro anchors as potential sensitizers in dye-sensitized solar cells, *New J. Chem.*, 2017, **41**(15), 7312-7321.
5. R. Chauhan, M. Shahid, M. Trivedi, D. P. Amalnerkar and A. Kumar, Dye-Sensitized Solar Cells with Biferrocenyl Antennae Having Quinoxaline Spacers, *Eur. J. Inorg. Chem.*, 2015, **22**, 3700-3707.
6. M. Cariello, S. Ahn, K. W. Park, S. K. Chang, J. Hong and G. Cooke, An investigation of the role increasing  $\pi$ -conjugation has on the efficiency of dye-sensitized solar cells fabricated from ferrocene-based dyes, *RSC Adv.*, 2016, **6**(11), 9132-9138.
7. A. Ghosh, S. Mishra, S. Giri, S. M. Mobin, A. Bera and S. Chatterjee, Electrolyte-free dye-sensitized solar cell with high open circuit voltage using a bifunctional ferrocene-based cyanovinyl molecule as dye and redox couple, *Organometallics*, 2018, **37**(13), 1999-2002.
8. A. Singh, G. Kociok-Köhn, R. Chauhan, M. Muddassir, S. W. Gosavi and A. Kumar, 2022. Ferrocene Appended Asymmetric Sensitizers with Azine Spacers with phenolic/nitro anchors for Dye-Sensitized Solar Cells, *J. Mol. Struct.*, 2022, **1249**, 131630.
9. R. Chauhan, M. Trivedi, L. Bahadur and A. Kumar, Application of  $\pi$ -extended ferrocene with varied anchoring groups as photosensitizers in TiO<sub>2</sub>-based dye-sensitized solar cells (DSSCs), *Chem. Asian J.*, 2011, **6**(6), 1525-1532.

10. S. Prabu, T. Viswanathan, E. David, S. Jagadeeswari and N. Palanisami, Enhancement of photovoltaic performance in ferrocenyl  $\pi$ -extended multi donor- $\pi$ -acceptor (D-D'- $\pi$ -A) dyes using chenodeoxycholic acid as a dye co-adsorbent for dye sensitized solar cells, *RSC Adv.*, 2023,**13**, 9761-9772.
11. M. S. An, S. W. Kim and J. D. Hong, Synthesis and characterization of peripherally ferrocene-modified zinc phthalocyanine for dye-sensitized solar cell, *Bull. Korean Chem. Soc.*, 2010, 31(11), 3272-3278.
12. A. H. Anizaim, D. A. Zainuri, M. F. Zaini, I. A. Razak, H. Bakhtiar and S. Arshad, Comparative analyses of new donor- $\pi$ -acceptor ferrocenyl-chalcones containing fluoro and methoxy-fluoro acceptor units as synthesized dyes for organic solar cell material, *PLoS One*, 2020, **15**(11), e0241113.
13. D. Sirbu, C. Turta, A. C. Benniston, F. Abou-Chahine, H. Lemmetyinen, N. V. Tkachenko, C. Wood and E. Gibson, Synthesis and properties of a meso-tris-ferrocene appended zinc (II) porphyrin and a critical evaluation of its dye sensitised solar cell (DSSC) performance, *RSC Adv.*, 2014, **4**(43), 22733-22742.
